# Supplementary material
Source: MDPI journal article supplement (https://www.mdpi.com/2072-4292/12/18/2991)

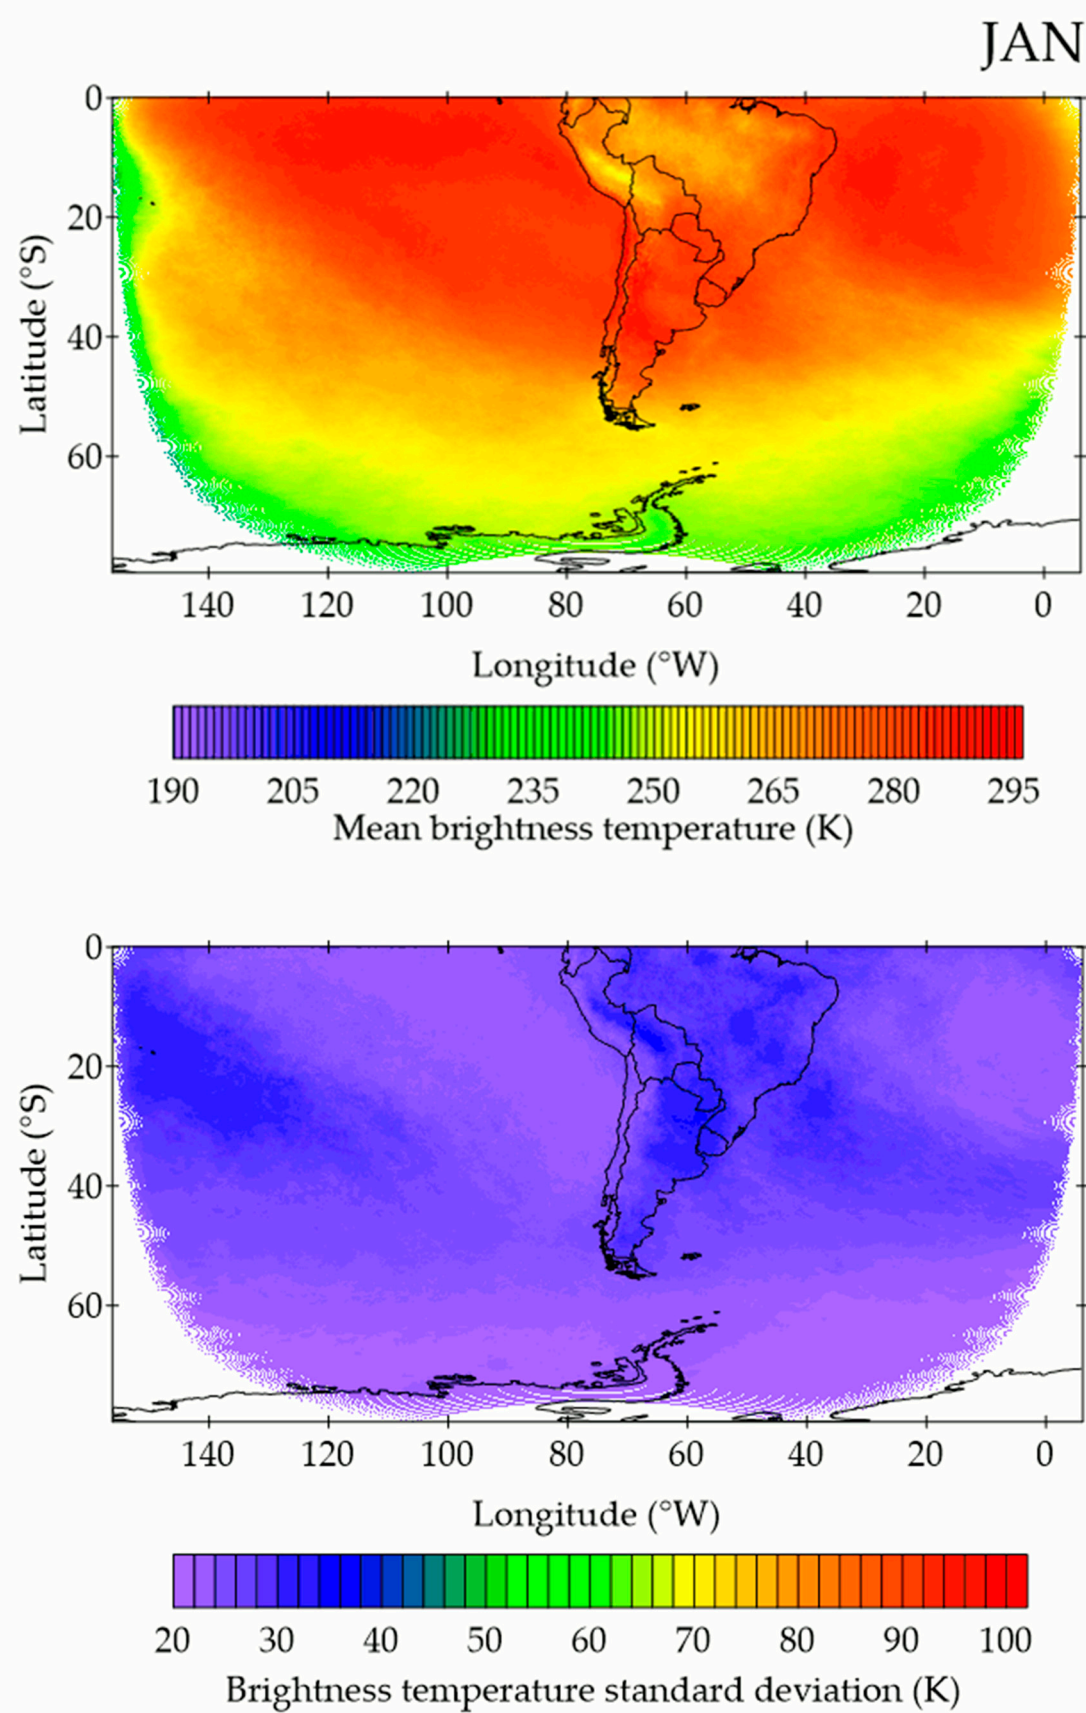

Figure 1.

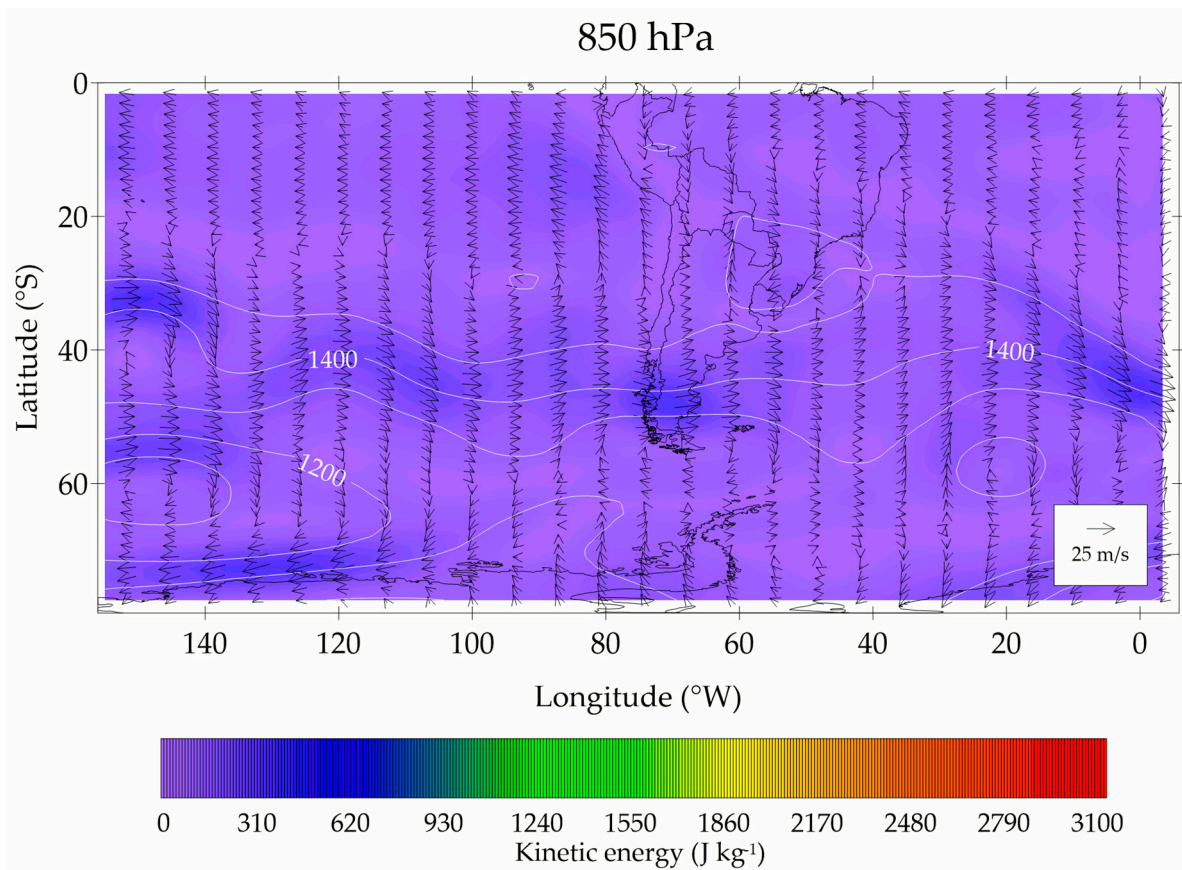

**Figure S2.**

Supplement: s1 [file s1]
